# Supplementary material
Source: MDPI journal article supplement (https://www.mdpi.com/2072-4292/11/11/1287)
Supplement: s1 [file s1]

## Supplementary Materials

# Improved Modeling of Gross Primary Productivity of Alpine Grasslands on the Tibetan Plateau Using the Biome-BGC Model

Yongfa You <sup>1,2</sup>, Siyuan Wang <sup>1,\*</sup>, Yuanxu Ma <sup>1</sup>, Xiaoyue Wang <sup>3</sup> and Weihua Liu <sup>1,2</sup>

<sup>1</sup> Key Laboratory of Digital Earth Science, Institute of Remote Sensing and Digital Earth, Chinese Academy of Sciences, Beijing 100094, China; youyf@radi.ac.cn (Y.Y.); mayx@radi.ac.cn (Y.M.); liuw@radi.ac.cn (W.L.)

<sup>2</sup> College of Resources and Environment, University of Chinese Academy of Sciences, Beijing 100049, China

<sup>3</sup> Key Laboratory of Land Surface Pattern and Simulation, Institute of Geographical Sciences and Natural Resources Research, Chinese Academy of Sciences, Beijing 100101, China; wangxy@igsnrr.ac.cn (X.W.)

\* Correspondence: wangsy@radi.ac.cn; Tel.: +86-10-8217-8170

- **Morris Method**

The Morris method is often used as the first step in global sensitivity analysis to screen out those parameters that have negligible effects on the output variables. Given that  $X = (x_1, \dots, x_n)$  represents the  $n$ -dimensional parameter vector and  $f(X)$  represents the model output, the elementary effect of the  $i$ th input parameter on the output variable can be defined as

$$d_i = \frac{f(x_1, \dots, x_{i-1}, x_i + \Delta, x_{i+1}, \dots, x_n) - f(X)}{\Delta} \quad (1)$$

where  $d_i$  is the elementary effect of the  $i$ th input parameter,  $\Delta$  is a predetermined multiple of  $1/(p - 1)$ , and  $p$  is the number of levels corresponding to quantiles of the parameter distribution. After repeating this procedure  $r$  times, the sensitivity measures of the Morris method can be obtained, which are defined as

$$\mu_i = \sum_{j=1}^r d_i(j)/r \quad (2)$$

and

$$\sigma_i = \sqrt{\sum_{j=1}^r (d_i(j) - \mu_i)^2 / r} \quad (3)$$

where  $\mu_i$  and  $\sigma_i$  are the mean and standard deviation of  $d_i$ , respectively.

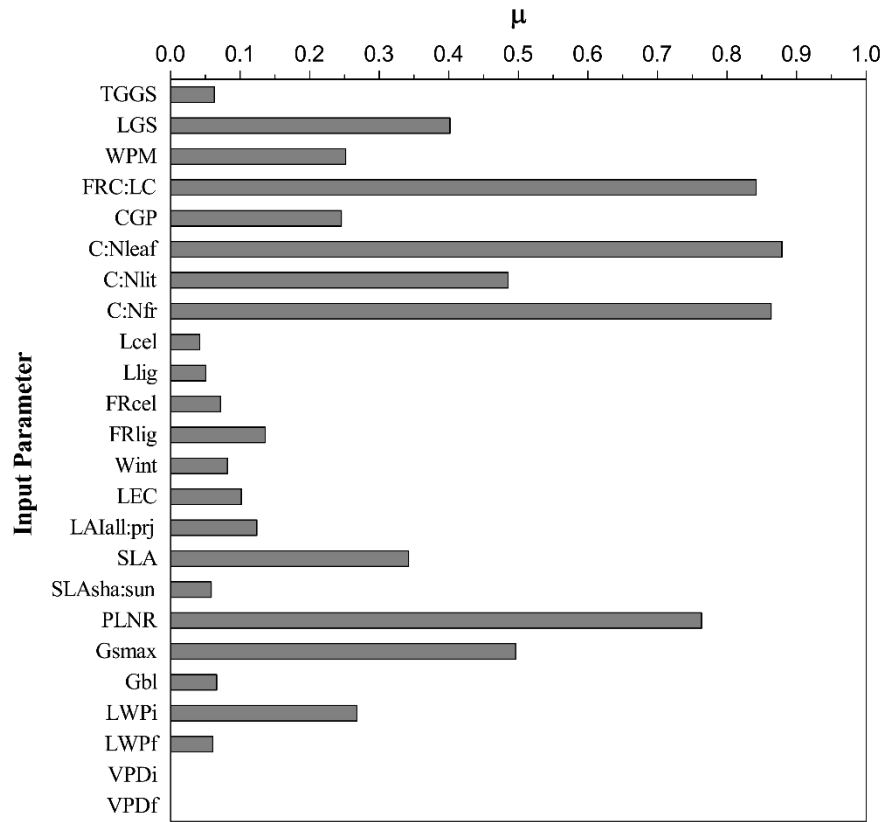

(a)

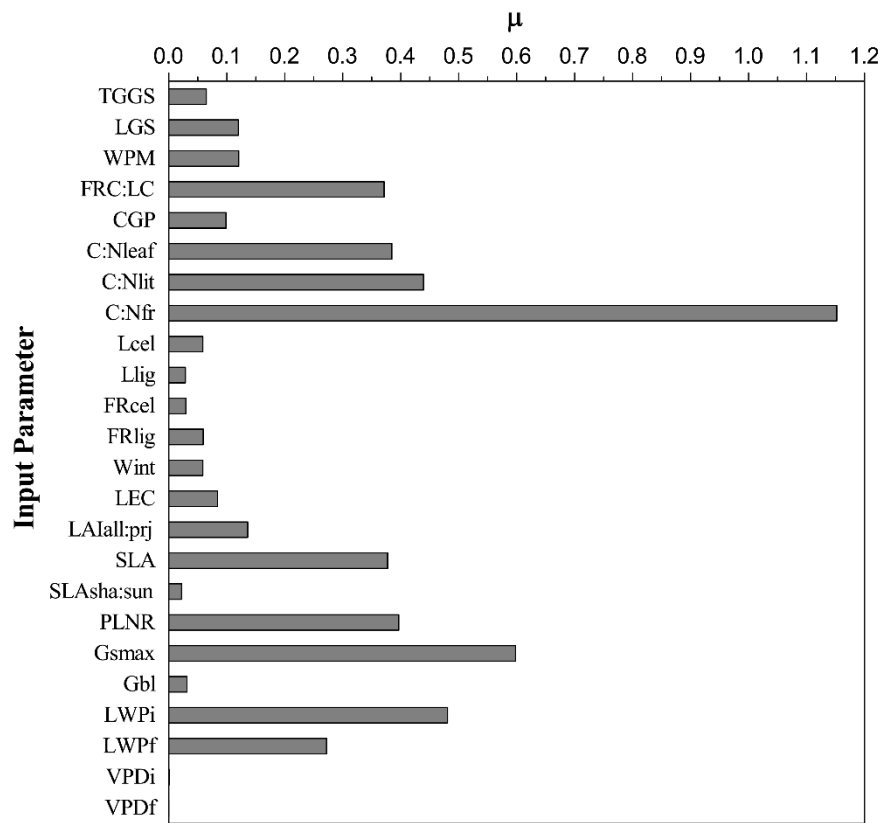

(b)

**Figure 1.** Morris sensitivity indices of mean annual GPP to the input ecophysiological parameters. **(a)** Haibei Station (alpine meadow); **(b)** Damxung Station (alpine steppe).

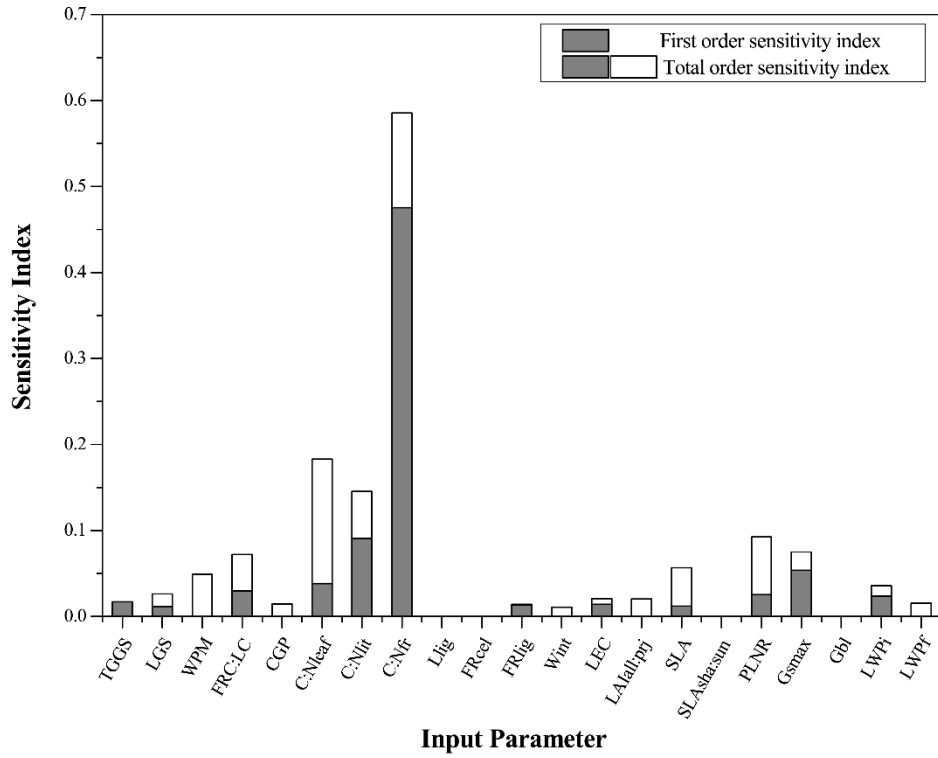

(a)

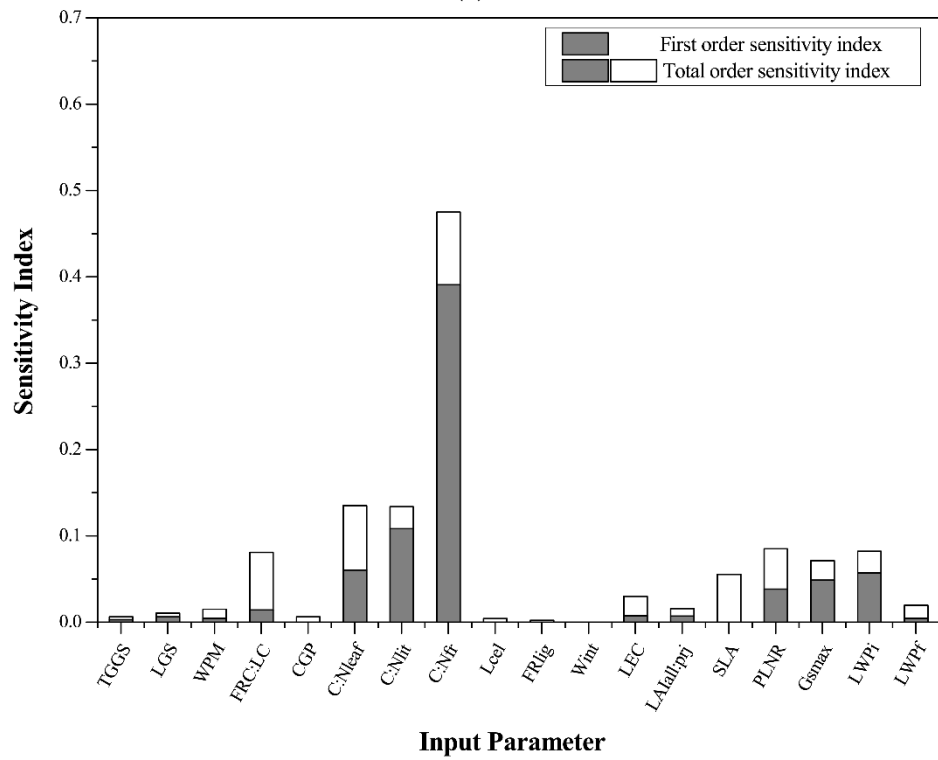

(b)

**Figure 2.** Sobol' sensitivity indices of mean annual GPP to the input ecophysiological parameters screened by the Morris method. (a) Haibei Station (alpine meadow); (b) Damxung Station (alpine steppe).

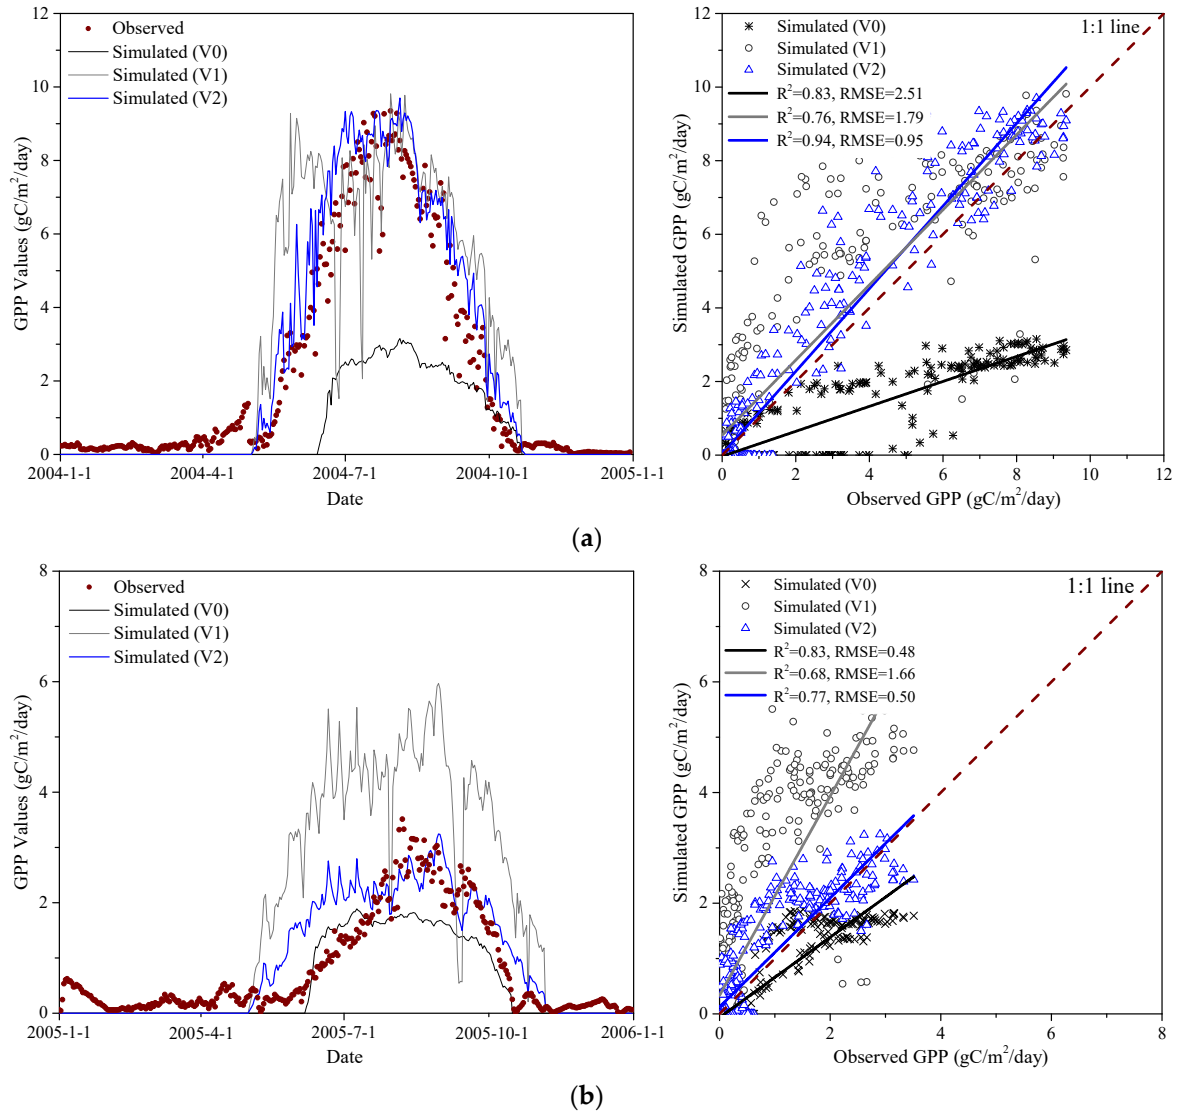

**Figure 3.** Comparisons between GPP derived from EC measurements and GPP simulated by the version of V0, V1, and V2 for the validation year. (a) Haibei Station (alpine meadow); (b) Damxung Station (alpine steppe).

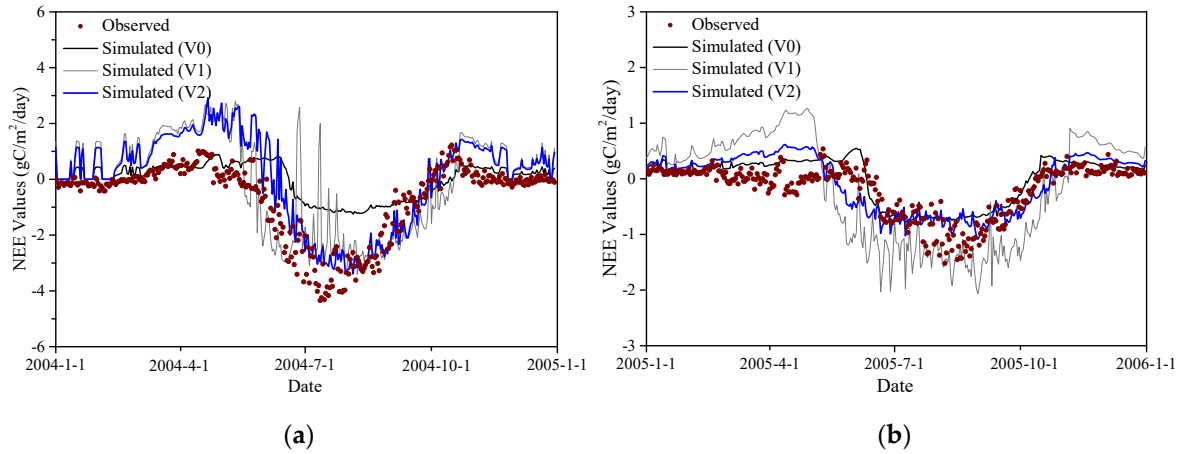

**Figure 4.** Comparisons between NEE measured by EC technique and NEE simulated by the version of V0, V1, and V2 for the validation year. **(a)** Haibei Station (alpine meadow); **(b)** Damxung Station (alpine steppe).

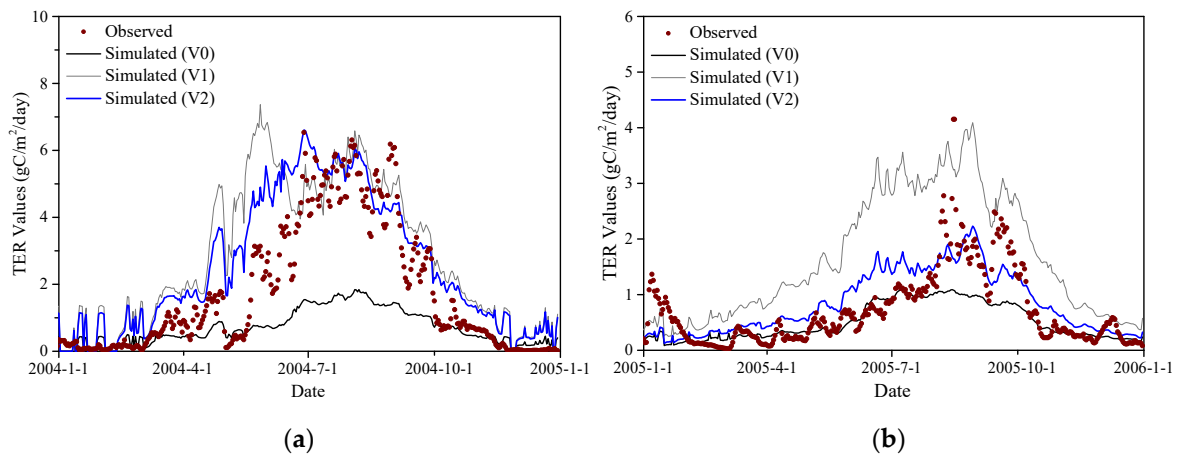

**Figure 5.** Comparisons between TER derived from EC measurements and TER simulated by the version of V0, V1, and V2 for the validation year. **(a)** Haibei Station (alpine meadow); **(b)** Damxung Station (alpine steppe).
